# Supplementary material
Source: MDPI journal article supplement (https://www.mdpi.com/2313-0105/8/10/150)
Supplement: s1 [file s1 › batteries-1839455-supplementary.pdf]

## Supplementary Information

Preparing Co/N doped carbon as an efficient electrocatalyst toward oxygen reduction reaction via the ancient “Pharaoh’s Snakes” reaction

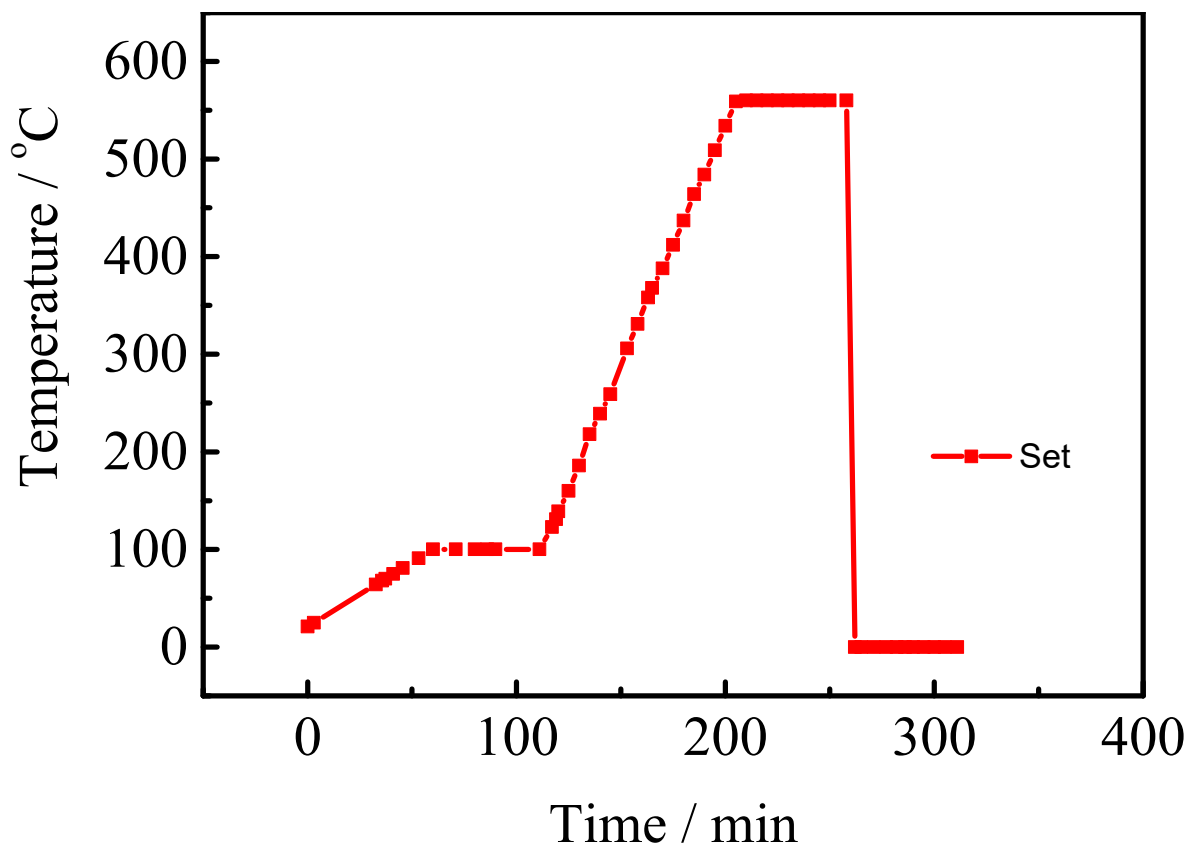

Figure S1 Temperature-time curve

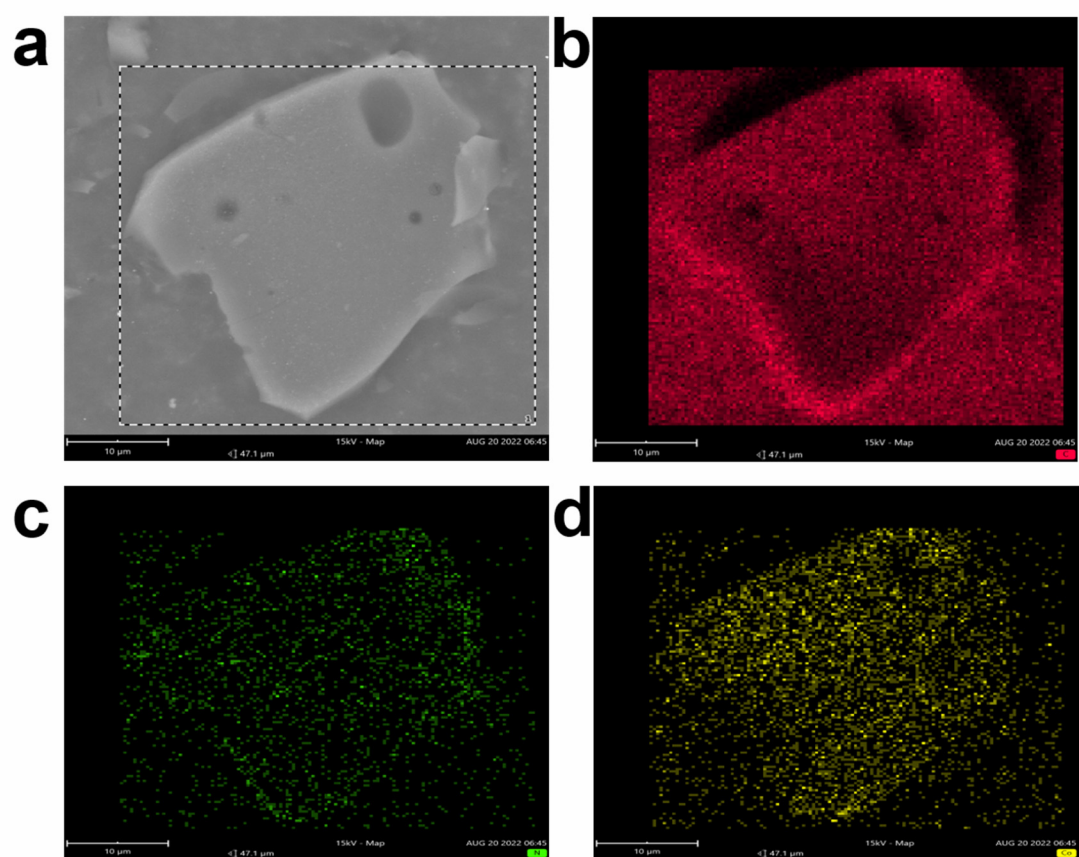

Figure S2 SEM mapping, (a) SEM image, (b) C, (c) N, (d) Co.

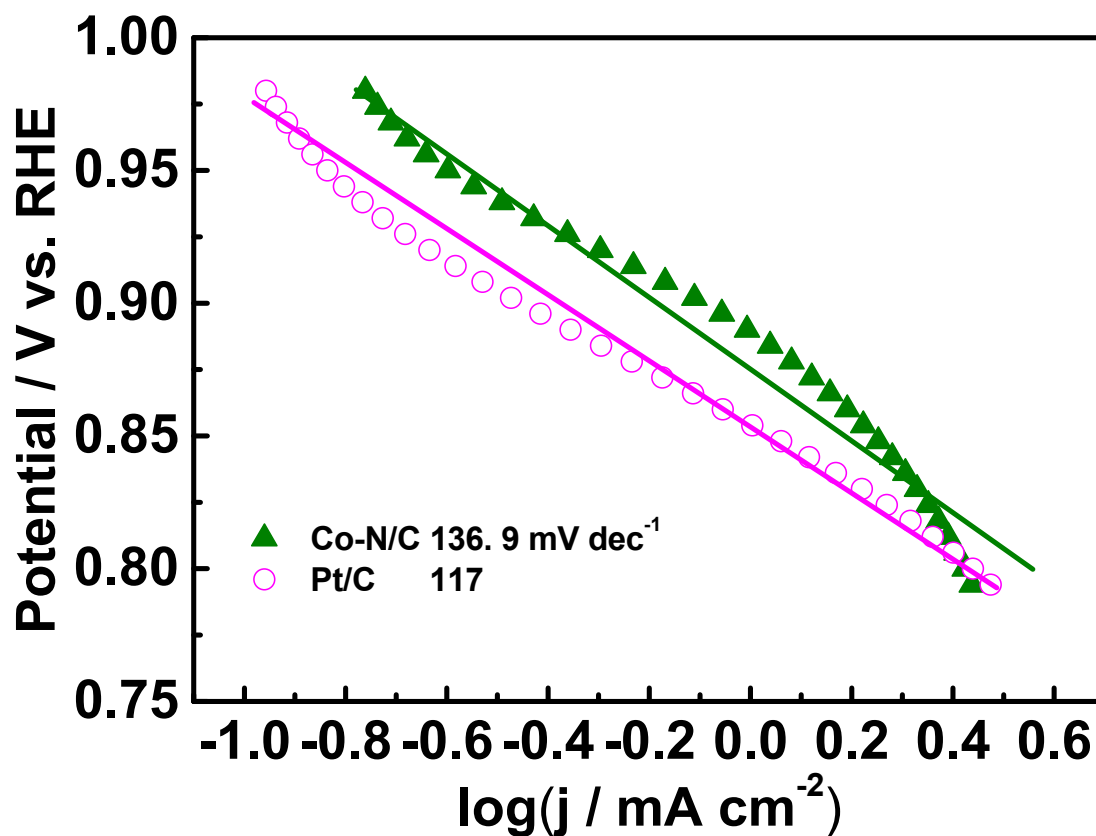

Figure S3 Tafel plots of Co/N-C-900 and Pt/C 20 wt. %

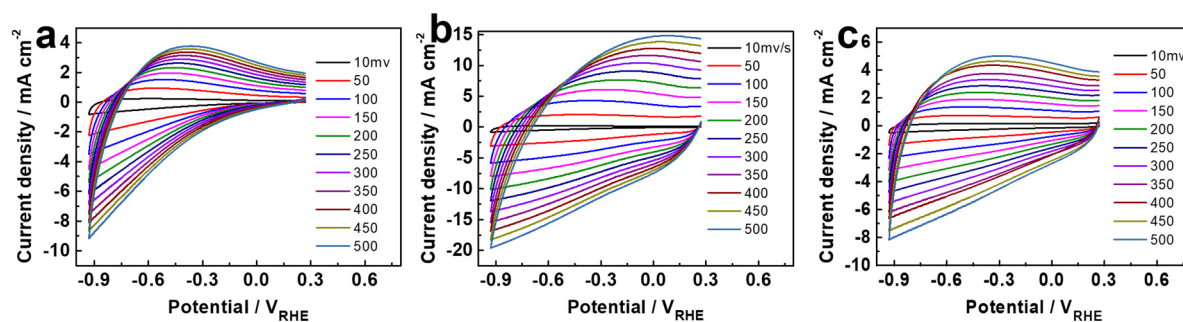

Figure S4 CV curves at various scanning rates for Co/N-C-800(a), Co/N-C -900(b) and Co/N-C -1000 (c).
